# Supplementary material for: Clonal Evolutionary Analysis during HER2 Blockade in HER2-Positive Inflammatory Breast Cancer: A Phase II Open-Label Clinical Trial of Afatinib +/- Vinorelbine
Source: PLoS Med. 2016 Dec 6;13(12):e1002136. doi: 10.1371/journal.pmed.1002136 (PMC5140058; doi:10.1371/journal.pmed.1002136)
Supplement: S4 Table — IDC, invasive ductal carcinoma; ILC, invasive lobular carcinoma. (XLSX) [file pmed.1002136.s016.xlsx]

## Sheet: S4 Table
S4 Table. Clinical characteristics of TCGA patients used in this study.
Case.ID	Age	Final.Pathology	ER.IHC	PR.IHC	HER2.IHC	HER2.FISH	ERBB2_amp	EGFR_gain	PIK3CA_amp	PTEN_loss	PTEN_mut	PIK3CA_mut	ERBB2_mut	PIK3CA_mut	PTEN_mut	PI3K_pathway_somatic_activation
TCGA-A1-A0SM	77	IDC	Positive	Negative	Positive	Positive	amp	neutral	neutral	neutral	0	0	0	0	0	No
TCGA-A1-A0SN	50	IDC	Positive	Positive	Positive	NA	amp	gain	neutral	neutral	0	0	0	0	0	No
TCGA-A2-A04W	50	Other	Negative	Negative	Positive	Positive	amp	neutral	neutral	loss	0	1	0	0	1	Yes
TCGA-A2-A04X	34	IDC	Positive	Positive	Positive	Positive	amp	neutral	neutral	neutral	0	0	0	0	0	No
TCGA-A2-A0CX	52	IDC	Positive	Negative	Positive	NA	amp	loss	gain	loss	0	0	0	1	1	Yes
TCGA-A2-A0D1	76	IDC	Negative	Negative	Positive	Positive	amp	amp	NA	neutral	0	1	0	0	0	Yes
TCGA-A2-A0EQ	64	IDC	Negative	Negative	Positive	Negative	neutral	amp	loss	neutral	0	1	0	0	0	Yes
TCGA-A2-A0EY	62	IDC	Positive	Negative	Positive	Positive	amp	neutral	gain	neutral	0	0	0	1	0	Yes
TCGA-A2-A0T1	55	IDC	Negative	Negative	Positive	NA	amp	gain	neutral	neutral	0	0	0	0	0	No
TCGA-A2-A0YG	63	IDC	Positive	Positive	Positive	NA	amp	gain	gain	loss	0	0	0	1	1	Yes
TCGA-A2-A3XZ	46	IDC	Negative	Negative	Positive	NA	amp	gain	neutral	neutral	0	0	0	0	0	No
TCGA-A7-A2KD	53	IDC	Positive	Positive	Positive	NA	amp	neutral	neutral	neutral	0	0	0	0	0	No
TCGA-A7-A4SF	54	IDC	Positive	Negative	Positive	NA	amp	gain	loss	neutral	0	1	0	0	0	Yes
TCGA-A8-A06R	69	IDC	Positive	Negative	Positive	Positive	loss	loss	gain	neutral	0	1	0	1	0	Yes
TCGA-A8-A06T	75	IDC	Positive	Positive	Positive	Positive	neutral	neutral	neutral	neutral	0	0	0	0	0	No
TCGA-A8-A06U	80	IDC	Positive	Positive	Positive	Positive	NA	loss	amp	loss	0	1	0	1	1	Yes
TCGA-A8-A06X	77	IDC	Positive	Negative	Positive	Positive	loss	gain	neutral	gain	0	0	0	0	0	No
TCGA-A8-A075	42	IDC	Positive	Positive	Positive	Positive	loss	neutral	neutral	neutral	0	1	0	0	0	Yes
TCGA-A8-A076	66	IDC	Positive	Positive	Positive	Positive	NA	gain	neutral	loss	0	0	0	0	1	Yes
TCGA-A8-A07B	69	Mixed.IDC.ILC	Positive	Positive	Positive	Positive	NA	neutral	neutral	neutral	0	1	0	0	0	Yes
TCGA-A8-A07I	69	IDC	Positive	Negative	Positive	Positive	amp	NA	neutral	neutral	0	0	0	0	0	No
TCGA-A8-A07P	68	IDC	Positive	Positive	Positive	Positive	amp	neutral	neutral	neutral	0	0	0	0	0	No
TCGA-A8-A07R	80	IDC	Negative	Negative	Positive	NA	neutral	loss	amp	loss	0	0	0	1	1	Yes
TCGA-A8-A08B	52	IDC	Positive	Negative	Positive	Positive	amp	loss	neutral	neutral	0	1	0	0	0	Yes
TCGA-A8-A08G	41	IDC	Positive	Positive	Positive	Positive	neutral	gain	neutral	neutral	0	0	0	0	0	No
TCGA-A8-A08H	66	IDC	Positive	Positive	Positive	Positive	neutral	neutral	neutral	neutral	0	0	0	0	0	No
TCGA-A8-A08P	70	IDC	Positive	Positive	Positive	Positive	amp	gain	amp	neutral	0	1	0	1	0	Yes
TCGA-A8-A08S	71	IDC	Positive	Positive	Positive	Positive	amp	loss	neutral	neutral	0	0	0	0	0	No
TCGA-A8-A08T	64	IDC	Positive	Positive	Positive	Positive	neutral	neutral	neutral	neutral	0	1	0	0	0	Yes
TCGA-A8-A08X	43	IDC	Negative	Negative	Positive	Positive	NA	gain	gain	loss	0	0	0	1	1	Yes
TCGA-A8-A090	74	Mixed.IDC.ILC	Positive	Positive	Positive	Positive	gain	neutral	neutral	neutral	0	0	0	0	0	No
TCGA-A8-A097	65	Mixed.IDC.ILC	Positive	Positive	Positive	Positive	amp	gain	neutral	loss	0	0	0	0	1	Yes
TCGA-A8-A099	76	Mixed.IDC.ILC	Positive	Positive	Positive	Positive	neutral	neutral	neutral	neutral	0	0	0	0	0	No
TCGA-A8-A09E	73	IDC	Positive	Positive	Positive	Positive	gain	neutral	gain	loss	1	0	0	1	1	Yes
TCGA-A8-A09G	79	Mixed.IDC.ILC	Positive	Negative	Positive	Positive	amp	NA	neutral	neutral	0	0	0	0	0	No
TCGA-A8-A09I	84	IDC	Positive	Positive	Positive	Positive	amp	neutral	neutral	neutral	0	0	0	0	0	No
TCGA-A8-A09N	57	IDC	Positive	Positive	Positive	Positive	loss	neutral	neutral	neutral	0	0	0	0	0	No
TCGA-A8-A0AB	54	ILC	Positive	Positive	Positive	Positive	neutral	neutral	neutral	neutral	0	0	1	0	0	Yes
TCGA-AC-A23C	62	IDC	Positive	Positive	Positive	Positive	amp	neutral	neutral	loss	1	0	0	0	1	Yes
TCGA-AC-A3TN	75	ILC	Positive	Positive	Positive	indeterminate	neutral	neutral	neutral	neutral	0	1	0	0	0	Yes
TCGA-AN-A03X	74	IDC	Positive	Positive	Positive	NA	neutral	neutral	neutral	neutral	0	1	0	0	0	Yes
TCGA-AN-A041	29	IDC	Positive	Negative	Positive	NA	gain	neutral	gain	neutral	0	0	0	1	0	Yes
TCGA-AN-A04C	51	IDC	Negative	Negative	Positive	NA	amp	neutral	neutral	neutral	0	0	0	0	0	No
TCGA-AN-A0AJ	79	IDC	Positive	Positive	Positive	NA	neutral	loss	neutral	loss	0	1	0	0	1	Yes
TCGA-AN-A0AK	76	IDC	Positive	Negative	Positive	NA	neutral	neutral	neutral	neutral	0	1	0	0	0	Yes
TCGA-AN-A0FD	71	IDC	Positive	Positive	Positive	Positive	loss	neutral	neutral	neutral	0	0	0	0	0	No
TCGA-AN-A0FJ	59	IDC	Positive	Negative	Positive	NA	loss	gain	gain	gain	0	0	0	1	0	Yes
TCGA-AN-A0FK	88	IDC	Positive	Positive	Positive	NA	neutral	neutral	neutral	neutral	0	0	0	0	0	No
TCGA-AN-A0FL	62	Other	Negative	Negative	Positive	NA	loss	neutral	gain	neutral	0	0	0	1	0	Yes
TCGA-AN-A0FN	61	Mixed.IDC.ILC	Positive	Positive	Positive	NA	neutral	neutral	neutral	neutral	0	0	0	0	0	No
TCGA-AN-A0FS	55	Mixed.IDC.ILC	Positive	Negative	Positive	NA	neutral	neutral	neutral	neutral	0	1	0	0	0	Yes
TCGA-AN-A0FT	63	Other	Positive	Positive	Positive	NA	amp	gain	neutral	neutral	0	0	0	0	0	No
TCGA-AN-A0FV	58	IDC	Negative	Negative	Positive	NA	amp	gain	neutral	loss	0	0	0	0	1	Yes
TCGA-AN-A0FX	52	IDC	Negative	Negative	Positive	NA	loss	neutral	gain	loss	0	0	0	1	1	Yes
TCGA-AN-A0FZ	45	IDC	Positive	Negative	Positive	NA	neutral	loss	neutral	loss	0	0	0	0	1	Yes
TCGA-AN-A0XP	69	IDC	Positive	Positive	Positive	NA	neutral	neutral	neutral	neutral	0	1	0	0	0	Yes
TCGA-AN-A0XV	67	IDC	Positive	Positive	Positive	Negative	neutral	neutral	neutral	neutral	0	0	0	0	0	No
TCGA-AN-A0XW	36	IDC	Positive	Positive	Positive	Negative	neutral	neutral	neutral	loss	1	0	0	0	1	Yes
TCGA-AO-A03L	34	IDC	Positive	Positive	Positive	Negative	amp	loss	gain	neutral	0	0	0	1	0	Yes
TCGA-AO-A0JE	53	IDC	Negative	Negative	Positive	Positive	amp	neutral	neutral	neutral	0	0	0	0	0	No
TCGA-AO-A0JM	40	IDC	Positive	Positive	Positive	Positive	amp	neutral	neutral	neutral	0	0	0	0	0	No
TCGA-AQ-A0Y5	70	Mixed.IDC.ILC	Positive	Positive	Positive	Positive	amp	neutral	neutral	neutral	0	0	0	0	0	No
TCGA-AR-A0TX	64	Other	Positive	Positive	Positive	NA	amp	neutral	neutral	neutral	0	0	0	0	0	No
TCGA-AR-A1AX	64	IDC	Positive	Positive	Positive	NA	amp	neutral	neutral	neutral	0	0	0	0	0	No
TCGA-AR-A254	50	IDC	Positive	Positive	Positive	NA	amp	NA	loss	loss	0	0	0	0	1	Yes
TCGA-AR-A255	62	IDC	Positive	positive	Positive	NA	gain	loss	gain	neutral	0	0	0	1	0	Yes
TCGA-AR-A5QN	68	ILC	Positive	Positive	Positive	NA	neutral	neutral	neutral	neutral	0	0	0	0	0	No
TCGA-BH-A0AU	45	IDC	Positive	Positive	Positive	Negative	neutral	neutral	neutral	neutral	0	0	0	0	0	No
TCGA-BH-A0AW	56	Mixed.IDC.ILC	Positive	Negative	Positive	NA	amp	neutral	neutral	loss	0	0	0	0	1	Yes
TCGA-BH-A0B6	47	IDC	Positive	Positive	Positive	NA	loss	gain	gain	gain	0	0	0	1	0	Yes
TCGA-BH-A0B7	42	IDC	Positive	Positive	Positive	NA	amp	neutral	neutral	neutral	0	0	0	0	0	No
TCGA-BH-A0DD	58	IDC	Positive	Positive	Positive	Positive	amp	gain	neutral	neutral	0	0	0	0	0	No
TCGA-BH-A0DZ	43	IDC	Positive	Positive	Positive	NA	amp	neutral	neutral	neutral	0	0	0	0	0	No
TCGA-BH-A0EE	68	Other	Negative	Negative	Positive	NA	amp	neutral	neutral	gain	0	0	0	0	0	No
TCGA-BH-A0HY	60	IDC	Positive	Negative	Positive	NA	amp	neutral	neutral	neutral	0	0	0	0	0	No
TCGA-BH-A18H	63	IDC	Positive	Positive	Positive	Equivocal	loss	loss	neutral	neutral	0	0	0	0	0	No
TCGA-BH-A18I	53	IDC	Positive	Positive	Positive	NA	neutral	neutral	neutral	neutral	0	1	0	0	0	Yes
TCGA-BH-A18M	39	Other	Positive	Positive	Positive	Positive	neutral	neutral	neutral	neutral	0	0	0	0	0	No
TCGA-BH-A18Q	56	IDC	Negative	Negative	Positive	Negative	loss	loss	gain	neutral	0	0	0	1	0	Yes
TCGA-BH-A18R	50	IDC	Indeterminate	Negative	Positive	Positive	amp	neutral	neutral	gain	0	0	0	0	0	No
TCGA-BH-A18T	70	IDC	Negative	Negative	Positive	Negative	neutral	neutral	gain	loss	0	0	0	1	1	Yes
TCGA-BH-A18U	72	IDC	Positive	Positive	Positive	NA	amp	amp	amp	neutral	0	0	0	1	0	Yes
TCGA-BH-A1EN	78	Other	Negative	Negative	Positive	NA	amp	gain	loss	neutral	0	0	0	0	0	No
TCGA-BH-A1EV	45	IDC	Positive	Positive	Positive	NA	amp	loss	gain	neutral	0	0	0	1	0	Yes
TCGA-BH-A1EX	67	IDC	Positive	Positive	Positive	Negative	neutral	gain	neutral	neutral	0	0	0	0	0	No
TCGA-BH-A1F2	53	IDC	Positive	Positive	Positive	NA	amp	neutral	neutral	loss	0	0	0	0	1	Yes
TCGA-BH-A1F8	90	IDC	Positive	Positive	Positive	NA	gain	NA	gain	loss	1	1	0	1	1	Yes
TCGA-BH-A202	60	IDC	Positive	Positive	Positive	NA	NA	neutral	neutral	loss	0	1	0	0	1	Yes
TCGA-BH-A42T	75	ILC	Positive	Positive	Positive	Equivocal	gain	neutral	gain	neutral	0	1	0	1	0	Yes
TCGA-C8-A12P	55	IDC	Negative	Negative	Positive	NA	amp	gain	gain	neutral	0	0	0	1	0	Yes
TCGA-C8-A12Q	78	IDC	Negative	Negative	Positive	NA	amp	gain	gain	neutral	0	0	0	1	0	Yes
TCGA-C8-A12T	43	IDC	Positive	Positive	Positive	NA	amp	neutral	neutral	gain	0	1	0	0	0	Yes
TCGA-C8-A12Z	45	Other	Negative	Negative	Positive	NA	amp	neutral	neutral	neutral	0	0	0	0	0	No
TCGA-C8-A135	64	IDC	Negative	Negative	Positive	NA	amp	neutral	loss	neutral	0	0	1	0	0	Yes
TCGA-C8-A137	34	Mixed.IDC.ILC	Negative	Negative	Positive	NA	amp	neutral	neutral	neutral	0	0	0	0	0	No
TCGA-C8-A1HF	48	IDC	Negative	Positive	Positive	NA	amp	neutral	gain	neutral	0	1	0	1	0	Yes
TCGA-C8-A1HK	53	IDC	Negative	Negative	Positive	NA	amp	neutral	neutral	neutral	0	0	0	0	0	No
TCGA-C8-A278	61	IDC	Negative	Negative	Positive	NA	amp	neutral	gain	neutral	0	1	0	1	0	Yes
TCGA-C8-A3M8	68	Mixed.IDC.ILC	Positive	Positive	Positive	NA	gain	neutral	gain	loss	0	0	0	1	1	Yes
TCGA-D8-A140	62	IDC	Positive	Positive	Positive	NA	amp	neutral	neutral	neutral	0	0	0	0	0	No
TCGA-D8-A1J9	48	IDC	Positive	Negative	Positive	NA	amp	loss	gain	neutral	0	0	0	1	0	Yes
TCGA-D8-A1X5	81	Mixed.IDC.ILC	Positive	Positive	Positive	NA	amp	neutral	gain	loss	0	0	0	1	1	Yes
TCGA-D8-A1XJ	76	Other	Positive	Positive	Positive	NA	amp	neutral	gain	neutral	0	0	0	1	0	Yes
TCGA-D8-A1XS	48	Other	Positive	Positive	Positive	NA	gain	neutral	neutral	neutral	0	1	0	0	0	Yes
TCGA-D8-A1XT	61	IDC	Negative	Negative	Positive	NA	amp	neutral	gain	neutral	0	0	0	1	0	Yes
TCGA-D8-A1XY	74	IDC	Positive	Positive	Positive	NA	gain	neutral	gain	neutral	0	1	0	1	0	Yes
TCGA-D8-A27N	36	IDC	Positive	Positive	Positive	NA	amp	neutral	gain	neutral	0	0	0	1	0	Yes
TCGA-E2-A10A	41	IDC	Positive	Positive	Positive	Negative	neutral	neutral	neutral	neutral	0	0	0	0	0	No
TCGA-E2-A14P	79	IDC	Negative	Negative	Positive	NA	amp	gain	amp	neutral	0	0	0	1	0	Yes
TCGA-E2-A14V	53	IDC	Positive	Positive	Positive	NA	amp	gain	neutral	neutral	0	0	0	0	0	No
TCGA-E2-A152	56	IDC	Positive	Negative	Positive	NA	amp	gain	gain	loss	0	0	0	1	1	Yes
TCGA-E2-A1B0	50	IDC	Negative	Negative	Positive	NA	amp	loss	loss	loss	0	0	0	0	1	Yes
TCGA-E2-A1LB	41	IDC	Negative	Negative	Positive	NA	amp	neutral	neutral	neutral	0	0	0	0	0	No
TCGA-E2-A1LE	71	IDC	Negative	Negative	Positive	NA	amp	amp	neutral	neutral	0	0	0	0	0	No
TCGA-E9-A1N4	41	IDC	Positive	Positive	Positive	NA	neutral	neutral	neutral	neutral	0	0	0	0	0	No
TCGA-E9-A1N5	45	IDC	Positive	Positive	Positive	NA	loss	neutral	neutral	neutral	0	1	0	0	0	Yes
TCGA-E9-A1N9	58	IDC	Negative	Positive	Positive	NA	neutral	neutral	neutral	neutral	0	0	0	0	0	No
TCGA-E9-A1NA	58	IDC	Positive	Positive	Positive	NA	loss	neutral	neutral	neutral	0	0	0	0	0	No
TCGA-E9-A1NC	61	Mixed.IDC.ILC	Negative	Positive	Positive	NA	loss	neutral	neutral	neutral	0	0	0	0	0	No
TCGA-E9-A1ND	75	IDC	Negative	Negative	Positive	NA	loss	neutral	neutral	NA	0	0	0	0	0	No
TCGA-E9-A22D	38	IDC	Positive	Positive	Positive	NA	amp	neutral	gain	neutral	0	0	0	1	0	Yes
TCGA-E9-A22E	56	Mixed.IDC.ILC	Positive	Positive	Positive	NA	loss	neutral	amp	loss	0	0	0	1	1	Yes
TCGA-E9-A22G	47	IDC	Negative	Negative	Positive	NA	loss	neutral	neutral	loss	0	0	0	0	1	Yes
TCGA-E9-A22H	42	IDC	Positive	Positive	Positive	NA	neutral	neutral	neutral	neutral	0	0	0	0	0	No
TCGA-E9-A295	71	ILC	Positive	Positive	Positive	NA	neutral	gain	loss	neutral	0	1	0	0	0	Yes
TCGA-E9-A3X8	48	Mixed.IDC.ILC	Positive	Positive	Positive	NA	neutral	neutral	neutral	neutral	0	0	0	0	0	No
TCGA-EW-A1IW	80	ILC	Positive	Positive	Positive	NA	amp	neutral	neutral	neutral	0	0	0	0	0	No
TCGA-EW-A1J3	61	Mixed.IDC.ILC	Positive	Positive	Positive	NA	amp	neutral	neutral	neutral	0	0	0	0	0	No
TCGA-JL-A3YW	49	Mixed.IDC.ILC	Positive	Positive	Positive	NA	neutral	amp	loss	loss	0	0	0	0	1	Yes
TCGA-JL-A3YX	46	Other	Positive	Positive	Positive	NA	neutral	neutral	neutral	neutral	0	1	0	0	0	Yes
TCGA-LL-A5YL	64	Mixed.IDC.ILC	Positive	Negative	Positive	Negative	neutral	neutral	neutral	neutral	0	0	0	0	0	No
